# Supplementary material for: Salting out in organic solvents: a new route to carbon nanotube bundle engineering
Source: Royal Society of Chemistry journal article supplement (doi:10.1039/c1cp21440c), 2011-01-01
Supplement: c1cp21440c.pdf [file c1cp21440c.pdf]

## Supporting information:

### Salting out in Organic Solvent: A New Route to Carbon Nanotube Bundle

#### Engineering

Maxim V. Fedorov<sup>\*1</sup>, Raz N. Arif<sup>2</sup>, Andrey I. Frolov<sup>1</sup>, Martin Kolar<sup>2,3</sup>, Anastasia O. Romanova<sup>1</sup>,  
Aleksy G. Rozhin<sup>\*2</sup>

<sup>1</sup>Max Planck Institute for Mathematics in the Sciences, D 04103 Leipzig, Germany

<sup>2</sup>School of Engineering & Applied Science, Aston University, Aston Triangle, Birmingham, B4 7ET, UK

<sup>3</sup>Faculty of Mechanical Engineering, Brno University of Technology, 616 69 Brno, Czech Republic

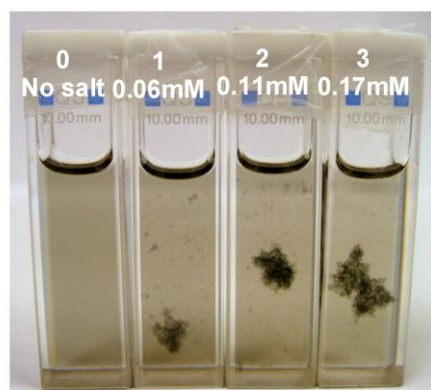

**Figure S1. Samples of the CNT-NMP dispersions with addition of different amounts of salt (NaI) and aging for 1 hour. The left sample (0) is the control CNT-NMP dispersion with no salt. There are visible aggregates in the samples 1-3 formed by self-assembly of CNTs stimulated by addition of the salt. The size of the aggregates increases with the increase of salt concentration.**

<sup>\*</sup>Corresponding authors: fedorov@mis.mpg.de (MVF), a.rozhin@aston.ac.uk (AGR)

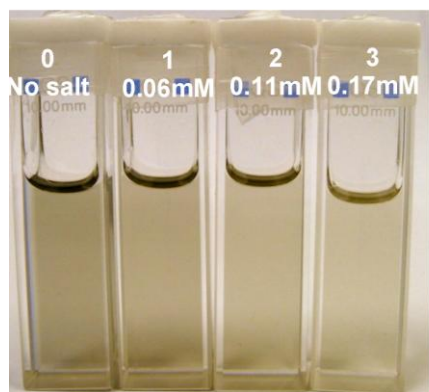

**Figure S2. Samples of the CNT-NMP dispersions with addition of different amounts of salt (NaI) and aging for 24 hours. We performed the centrifugation of all samples to extract bundles.**
